# Supplementary material for: Three-Dimensional (3D) Printed Silver Nanoparticles/Alginate/Nanocrystalline Cellulose Hydrogels: Study of the Antimicrobial and Cytotoxicity Efficacy
Source: PubMed Central journal article supplement (PMC7711489; doi:10.3390/nano10050844), 2020-04-28
Supplement: nanomaterials-10-00844-s001.pdf [file nanomaterials-10-00844-s001.pdf]

**Table S1.** List of peptides and SRM transitions monitored.

| <b>Acession n.</b> | <b>Protein Name</b> | <b>Peptide Sequence</b>          | <b>Precursor Mz</b> | <b>Prec. Char.</b> | <b>Product Mz</b> | <b>Fragment Ion</b> |
|--------------------|---------------------|----------------------------------|---------------------|--------------------|-------------------|---------------------|
| Q07817             | BCL-X               | EVIPMAAVK                        | 479,28              | 2                  | 616,35            | y6                  |
| Q07817             | BCL-X               | EVIPMAAVK                        | 479,28              | 2                  | 229,12            | b2                  |
| Q07817             | BCL-X               | EAGDEFELR                        | 533,25              | 2                  | 693,36            | y5                  |
| Q07817             | BCL-X               | EAGDEFELR                        | 533,25              | 2                  | 288,20            | y2                  |
| Q14790             | CASP-8              | MLEESNLSFLK                      | 655,84              | 2                  | 937,50            | y8                  |
| Q14790             | CASP-8              | MLEESNLSFLK                      | 655,84              | 2                  | 808,46            | y7                  |
| Q14790             | CASP-9              | MLEESNLSFLK                      | 655,84              | 2                  | 1066,54           | y9                  |
| Q14790             | CASP-8              | MLEESNLSFLK                      | 655,84              | 2                  | 245,13            | b2                  |
| Q14790             | CASP-8              | EQDSESQTLDK                      | 640,29              | 2                  | 691,36            | y6                  |
| Q14790             | CASP-8              | EQDSESQTLDK                      | 640,29              | 2                  | 476,27            | y4                  |
| P55211             | CASP-9              | LFFIQAC[+57]GGGEQK               | 699,35              | 2                  | 877,38            | y8                  |
| P55211             | CASP-9              | LFFIQAC[+57]GGGEQK               | 699,35              | 2                  | 408,23            | b3                  |
| P55211             | CASP-9              | ELFRPHMIEDIQR                    | 421,72              | 4                  | 303,18            | y2                  |
| P55211             | CASP-9              | ELFRPHMIEDIQR                    | 421,72              | 4                  | 634,81            | b10                 |
| P55211             | CASP-9              | FSSLHFMVEVK                      | 441,90              | 3                  | 246,18            | y2                  |
| P55211             | CASP-9              | FSSLHFMVEVK                      | 441,90              | 3                  | 545,29            | y9                  |
| P42574             | CASP-3              | SGTDVDAANLR                      | 559,78              | 2                  | 873,44            | y8                  |
| P42574             | CASP-3              | SGTDVDAANLR                      | 559,78              | 2                  | 758,42            | y7                  |
| P42574             | CASP-3              | EEIVELMR                         | 509,77              | 2                  | 647,35            | y5                  |
| P42575             | CASP-3              | EEIVELMR                         | 509,77              | 2                  | 548,29            | y4                  |
| P42578             | CASP-3              | GTELDC[+57]GIETDSGVDDDMAC[+57]HK | 808,99              | 3                  | 1012,89           | y18                 |
| P42579             | CASP-3              | GTELDC[+57]GIETDSGVDDDMAC[+57]HK | 808,99              | 3                  | 876,33            | y7                  |
| P46013             | ki-67 b             | ADVVEEFALR                       | 646,33              | 2                  | 1006,52           | y8                  |
| P46013             | ki-67 b             | ADVVEEFALR                       | 646,33              | 2                  | 877,48            | y7                  |
| P46013             | ki-67 b             | VEDAADSATKPENLSSK                | 587,96              | 3                  | 767,37            | y15                 |
| P46013             | ki-67 b             | VEDAADSATKPENLSSK                | 587,96              | 3                  | 229,12            | b2                  |
| P46013             | ki-67 b             | VEDAADSATKPENLSSK                | 587,96              | 3                  | 201,09            | b6                  |
| P46013             | ki-67 b             | VEDAADSATKPENLSSK                | 851,93              | 3                  | 831,89            | y16                 |
| P46013             | ki-67 b             | SQPDPVDTPTSSKPQSK                | 600,30              | 3                  | 792,40            | y15                 |
| P46013             | ki-67 b             | SQPDPVDTPTSSKPQSK                | 600,30              | 3                  | 216,10            | b2                  |
| P14210             | HGF                 | GEEGGPWC[+57]FTSNPEVR            | 911,40              | 2                  | 701,36            | y6                  |
| P14210             | HGF                 | GEEGGPWC[+57]FTSNPEVR            | 911,40              | 2                  | 802,41            | y7                  |
| P14210             | HGF                 | HIFWEPDASK                       | 615,30              | 2                  | 251,15            | b2                  |
| P14210             | HGF                 | HIFWEPDASK                       | 615,30              | 2                  | 517,26            | y5                  |

**Table S2.** Bradford assay protein quantitation (n=2).

| <b>Treatment</b>       | <b>2 Days</b>                        | <b>7 Days</b> |
|------------------------|--------------------------------------|---------------|
|                        | extracted proteins ( $\mu\text{g}$ ) |               |
| ALG                    | 146.5                                | 439.3         |
| ALG                    | 152.0                                | 442.1         |
| ALG+AgNPs (250ppm)     | 158.6                                | 263.1         |
| ALG+AgNPs (250ppm)     | 487.6                                | 244.4         |
| ALG/CNC+AgNPs (250ppm) | 164.8                                | 288.8         |
| ALG/CNC+AgNPs (250ppm) | 140.5                                | 328.0         |
